# Supplementary material
Source: PubMed Central journal article supplement (PMC3738298)
Supplement: NIHMS472636-supplement-Supplementary_Data_1.pdf [file NIHMS472636-supplement-Supplementary_Data_1.pdf]

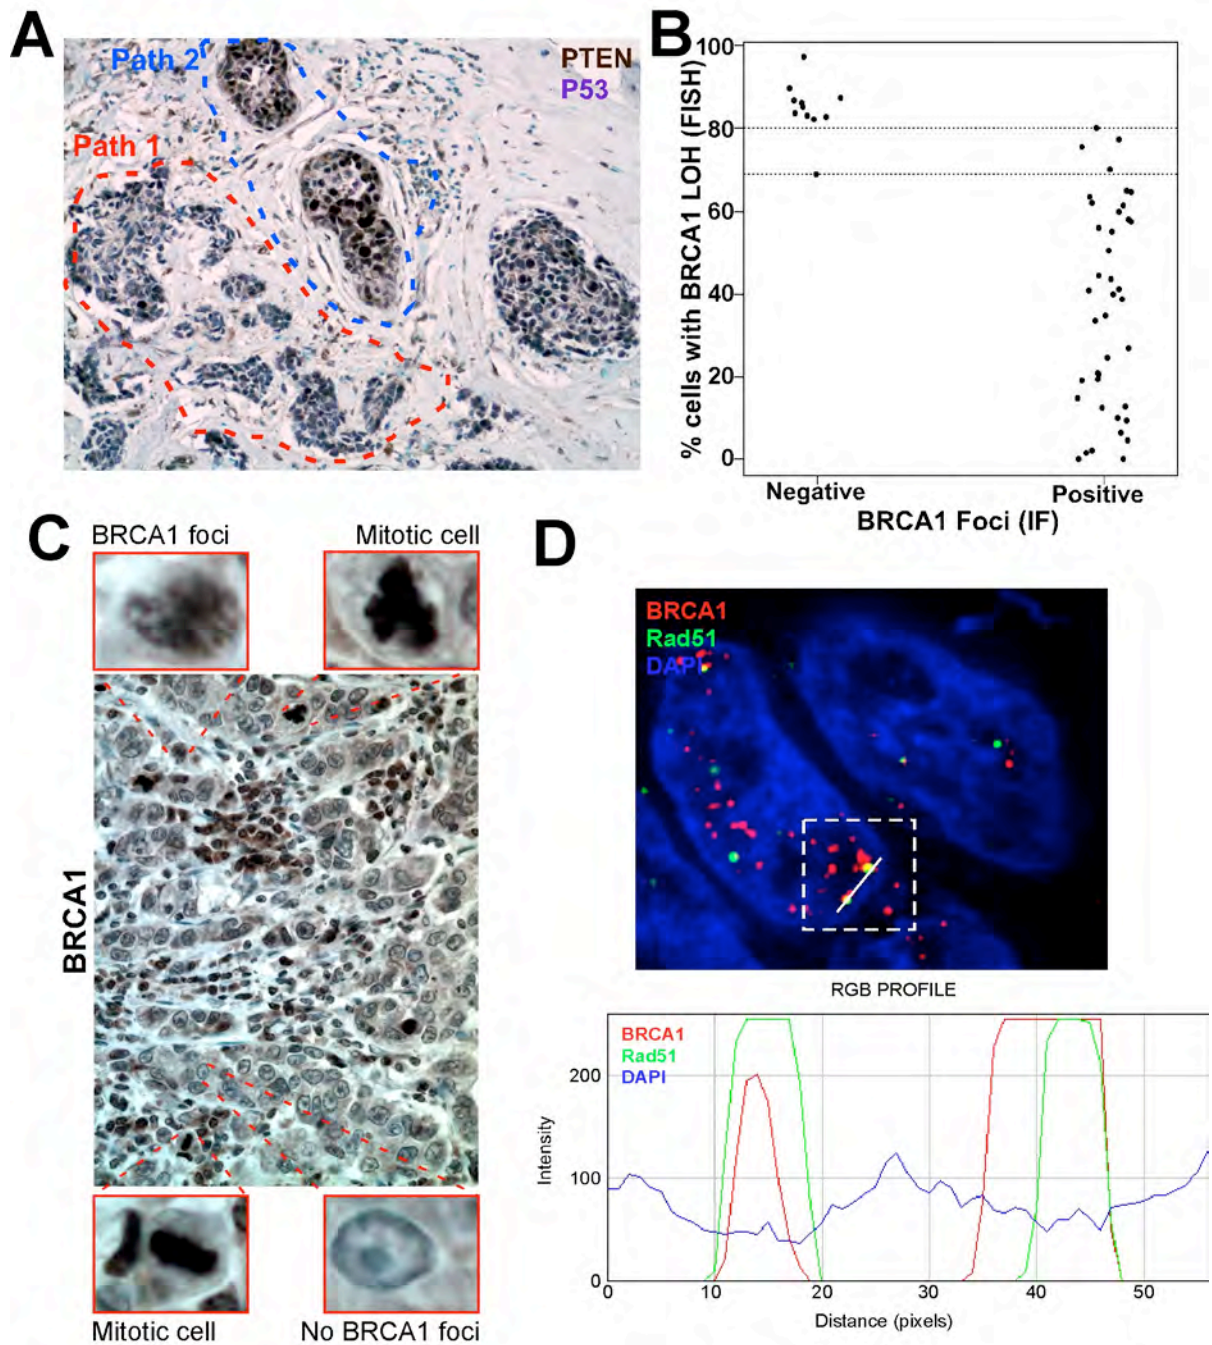

**Supplementary Figure S2. Evolutionary paths and BRCA1 expression in breast tumors. A,** Mixed evolution in tumor T44. Areas that appear to follow two distinct tumor evolution paths, differentiated by the presence (Path 2) or absence (Path 1) of PTEN and mutant (Path 2) and wild-type (Path 1) p53, are highlighted. **B,** Graph depicting the correlation between FISH and immunofluorescence (IF) data assessing BRCA1 status. **C,** Representative example of BRCA1 immunohistochemistry of a tumor heterogeneous for BRCA1 loss. Insets highlight tumor cells with and without BRCA1 foci and mitotic cells strongly positive for BRCA1. **D,** Representative example of BRCA1 and RAD51 double immunofluorescence depicting colocalization (yellow) of RAD51 (green) and BRCA1 (red) foci. RGB profile analysis confirms this overlap.
